# Supplementary material for: Myelin-Independent Therapeutic Potential of Canine Glial-Restricted Progenitors Transplanted in Mouse Model of Dysmyelinating Disease
Source: MDPI journal article supplement (doi:10.3390/cells10112968), 2021-11-01
Supplement: s1 [file s1]

# Supplementary Material

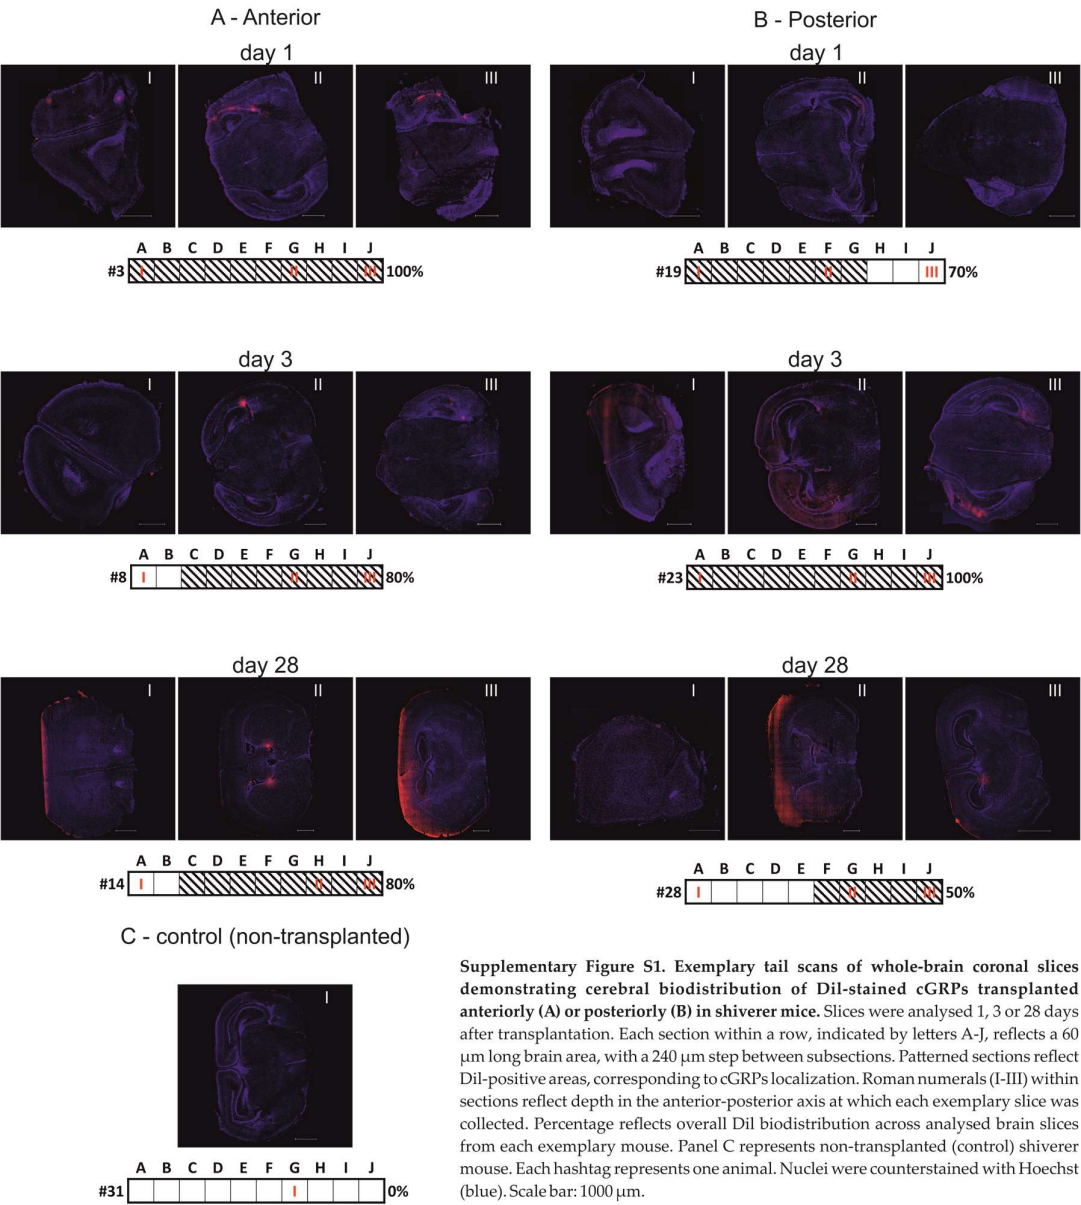

Supplementary Figure S1. Exemplary tail scans of whole-brain coronal slices demonstrating cerebral biodistribution of Dil-stained cGRPs transplanted anteriorly (A) or posteriorly (B) in shiverer mice. Slices were analysed 1, 3 or 28 days after transplantation. Each section within a row, indicated by letters A-J, reflects a 60  $\mu$ m long brain area, with a 240  $\mu$ m step between subsections. Patterned sections reflect Dil-positive areas, corresponding to cGRPs localization. Roman numerals (I-III) within sections reflect depth in the anterior-posterior axis at which each exemplary slice was collected. Percentage reflects overall Dil biodistribution across analysed brain slices from each exemplary mouse. Panel C represents non-transplanted (control) shiverer mouse. Each hashtag represents one animal. Nuclei were counterstained with Hoechst (blue). Scale bar: 1000  $\mu$ m.
